# Supplementary material
Source: publisher figshare collection journal article supplement (https://karger.figshare.com/ndownloader/files/28970592)
Supplement: Supplementary file 1 [file 28970592]

| Supplementary table 2. The distributions of four glycemic parameters. (n=170) | | | | | | | | |
| --- | --- | --- | --- | --- | --- | --- | --- | --- |
| Item | N | Min. | Max. | Mean | Stdev. | Median | IQR | Normal range |
| Fasting glucose (mg/dl) | 170 | 78.0 | 304.0 | 105.5 | 28.1 | 96.5 | 22.0 | 70~100 |
| HbA1c (%) | 170 | 4.1 | 11.0 | 6.0 | 1.0 | 5.8 | 0.7 | 4.0~5.6 |
| Insulin (uIU/ml) | 170 | 2.1 | 40.3 | 11.0 | 7.3 | 9.2 | 7.6 | 5~15 |
| HOMA-IR | 170 | 0.5 | 15.9 | 3.0 | 2.6 | 2.2 | 2.2 | <2.6 |
| Abbreviation: IQR, interquartile range. | | | | | | | | |
